# Supplementary material for: Bactericidal/Permeability-Increasing Protein Preeminently Mediates Clearance of Pseudomonas aeruginosa In Vivo via CD18-Dependent Phagocytosis
Source: PubMed Central journal article supplement (PMC8107240; doi:10.3389/fimmu.2021.659523), 2021-04-26
Supplement: DataSheet_1.pdf [file DataSheet_1.pdf]

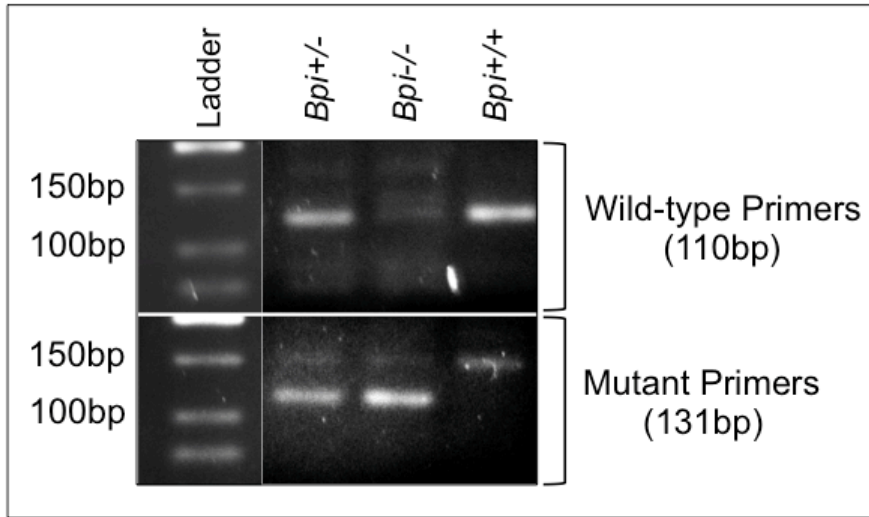

**Supplemental Figure 1:** Mouse genotype PCR results showing bands (110bp) with wt primers in *Bpi*<sup>+/-</sup> and *Bpi*<sup>+/+</sup> mice, and bands (131bp) with BPI-mutant primers in *Bpi*<sup>+/-</sup> and *Bpi*<sup>-/-</sup> mice.

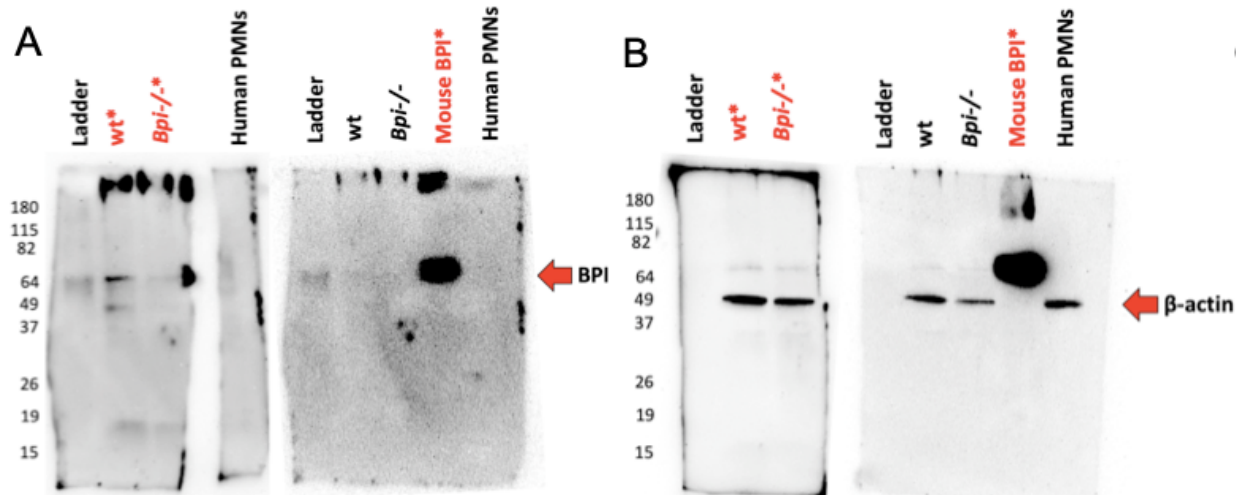

Full unedited blot for Figure 1A

\*appeared in the manuscript

Full unedited blot for Figure 1A

\*appeared in the manuscript

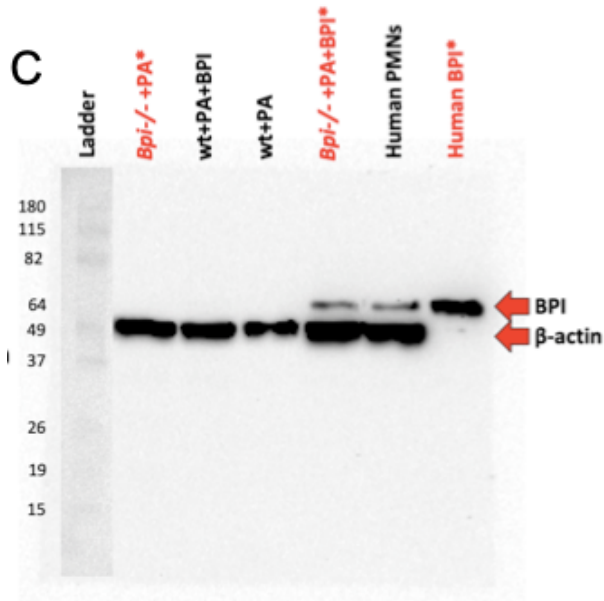

Full unedited blot for Figure 4D

\*appeared in the manuscript

**Supplemental Figure 2: Full western blot images.** (A) Immunoblots of anti-mouse BPI (mBPI) (amino acids 256-269) reactivity to neutrophil lysates (20  $\mu$ g) from wild type (wt) and BPI-deficient (*Bpi*<sup>-/-</sup>) mice. Recombinant mBPI (0.5  $\mu$ g) used as control. (B) Immunoblots of anti-beta actin antibody reactivity to neutrophil lysates (20  $\mu$ g) from wild type (wt) and BPI-deficient (*Bpi*<sup>-/-</sup>) mice. Recombinant mBPI (0.5  $\mu$ g) used as control. (C) Immunoblot of peritoneal cell lysates (10 $\mu$ g protein, *Bpi*<sup>-/-</sup>) shows uptake of hBPI with anti-hBPI IgG (amino acids 227-254) following PA14 infection with or without BPI treatment *in vivo*. Anti-beta actin antibody and recombinant mBPI (0.05 $\mu$ g) were used as controls.

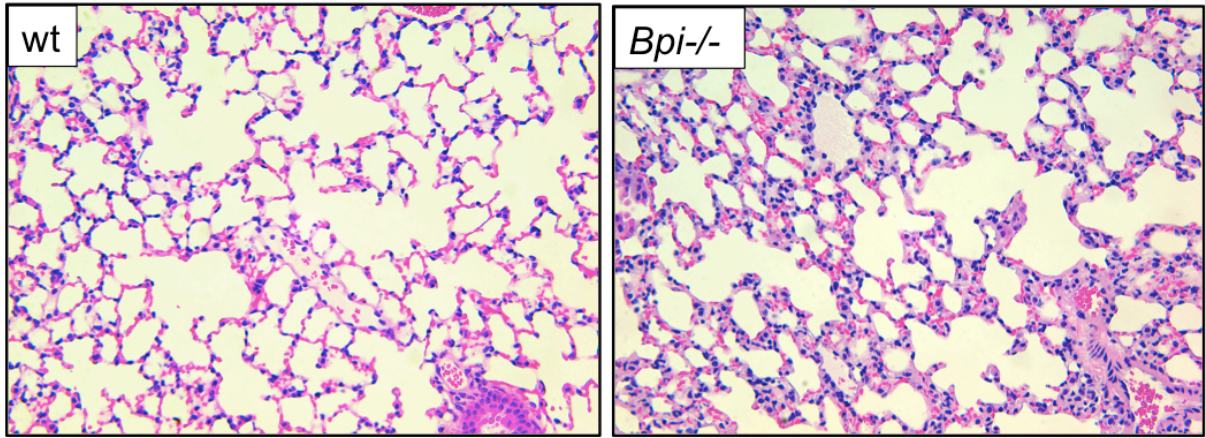

**Supplemental Figure 3:** Baseline lung pathology of uninfected wt and *Bpi*<sup>-/-</sup> mice. Representative H&E staining shown, 40X magnification.

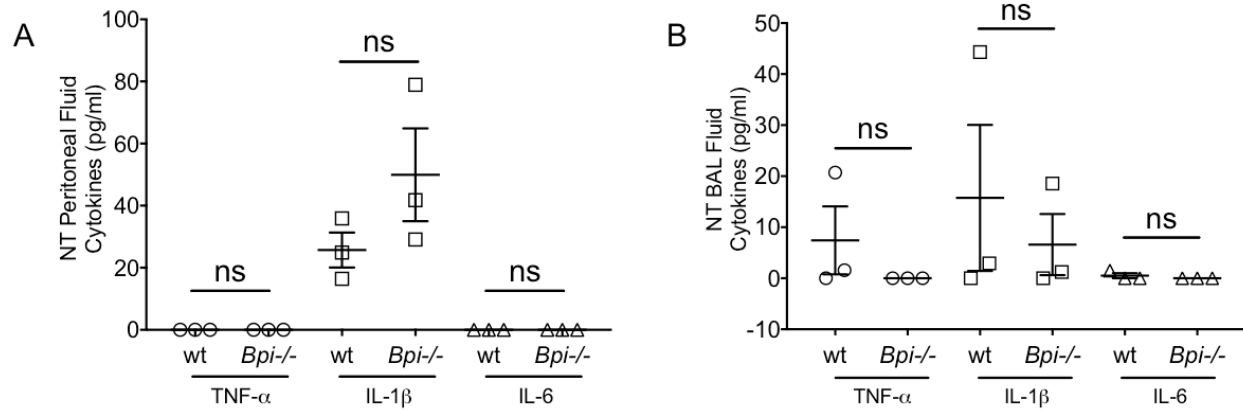

**Supplemental Figure 4: Baseline peritoneal and BAL fluid inflammatory cytokine levels in wild type (wt) and BPI-deficient (*Bpi*<sup>-/-</sup>) mice. (A) Peritoneal fluid cytokines (TNF $\alpha$ , IL-1 $\beta$ , IL-6, pg/ml) measured from mice (n=5) treated with PBS (3hrs) peritoneally. (B) Bronchoalveolar lavage (BAL) fluid cytokines (pg/ml) measured from mice (n=5) treated with PBS (3hrs) via oropharyngeal route. NT: no treatment. Data were analyzed by paired t-test; \*p < 0.05; Error bars represent mean  $\pm$  SEM.**

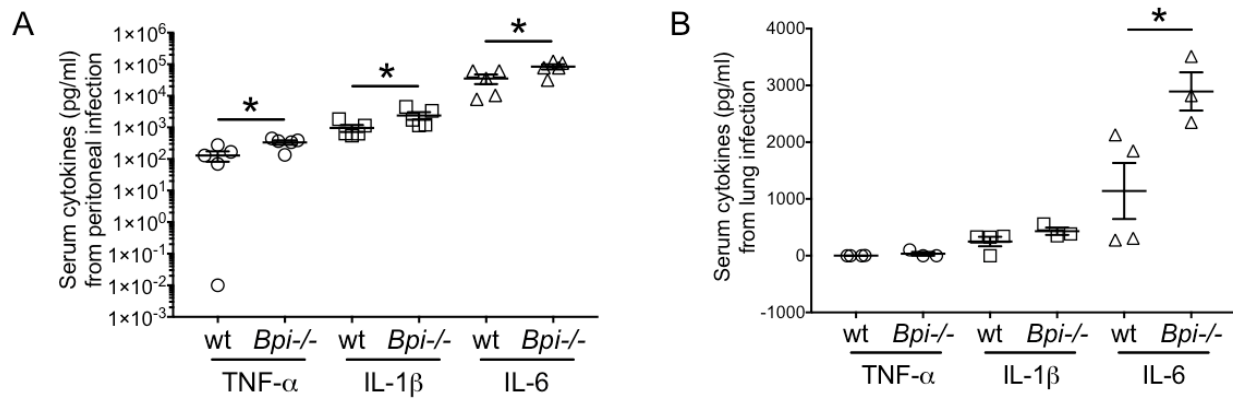

**Supplemental Figure 5: Serum inflammatory cytokine levels in wild type (wt) and BPI-deficient (*Bpi*<sup>-/-</sup>) mice infected with *P. aeruginosa*. (A) Serum cytokines (TNF $\alpha$ , IL-1 $\beta$ , IL-6, pg/ml) measured in mice (n=5) infected with *P. aeruginosa* PA14 ( $3 \times 10^6$  CFU, 3hpi) via intraperitoneal route. (B) Serum cytokines (pg/ml) measured in mice (n=5) infected with *P. aeruginosa* PA14 ( $3 \times 10^6$  CFU, 3hpi) via oropharyngeal route. Data were analyzed by paired t-test; \*p < 0.05; Error bars represent mean  $\pm$  SEM.**

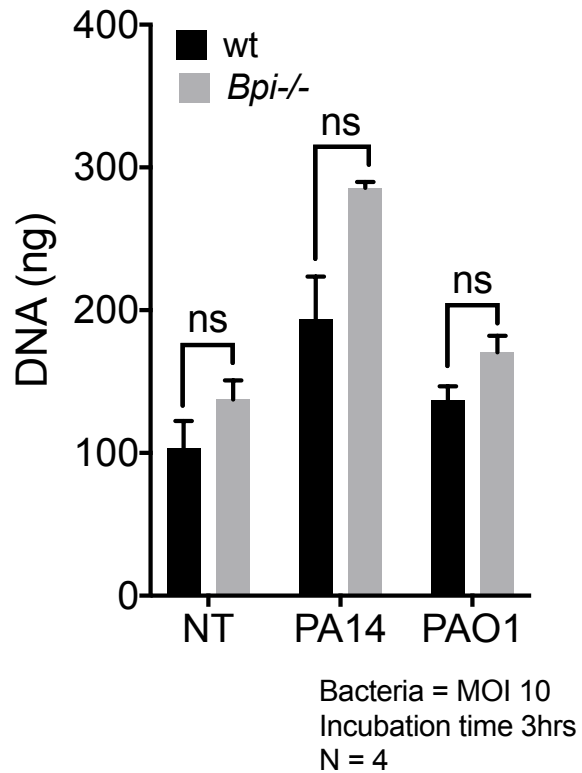

**Supplemental Figure 6: No difference in NETosis was observed between wt and *Bpi*<sup>-/-</sup> neutrophils.** Neutrophil extracellular DNA release was shown between wt and *Bpi*<sup>-/-</sup> neutrophils stimulated with PA14 or PAO1 *P. aeruginosa* MOI10. Data were analyzed by paired t-test; ns = not significant; Error bars represent mean ± SEM.

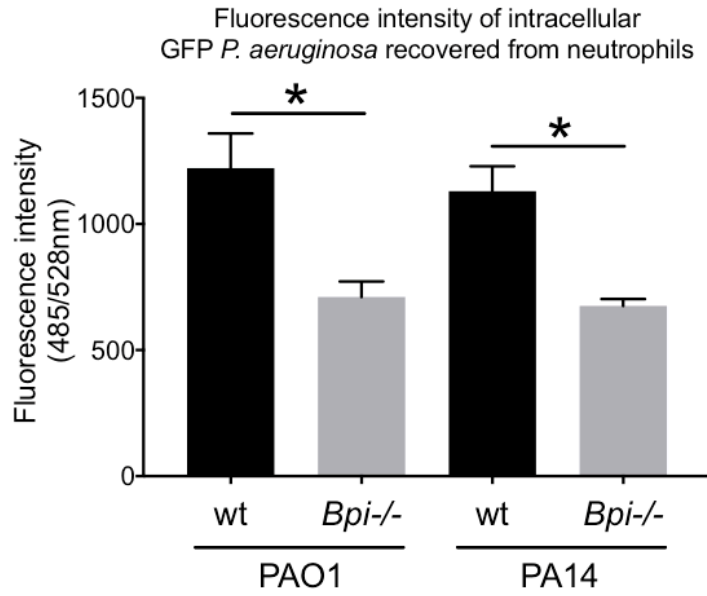

**Supplemental Figure 7: BPI is required for efficient phagocytosis of GFP-expressing *P. aeruginosa* PAO1 and PA14 (MOI 10) by neutrophils *in vitro*, as measured by fluorescence intensity (n=3). Data were analyzed by Student t-test; \*p < 0.05; Error bars represent mean ± SEM.**

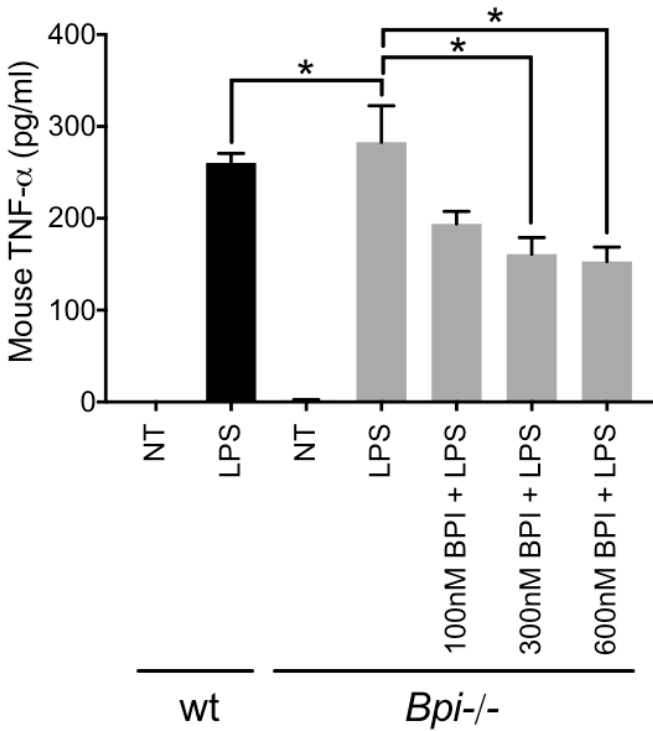

**Supplemental Figure 8: Addition of human BPI (hBPI) neutralizes LPS-induced TNF $\alpha$  release in *Bpi*<sup>-/-</sup> mouse PMNs.** Thioglycollate-recruited wild type (wt) or BPI-deficient (*Bpi*<sup>-/-</sup>) neutrophils were pre-treated with human BPI (hBPI, 0-600nM) before exposed to *E. coli* LPS (0.1ng/ml). Supernatants from *Bpi*<sup>-/-</sup> mPMNs showed a reduction in TNF $\alpha$  with increased hBPI, in a dose-dependent manner (n=4); data were analyzed by unpaired t-test with Welch's correction. \*p < 0.05; Error bars represent mean  $\pm$  SEM.



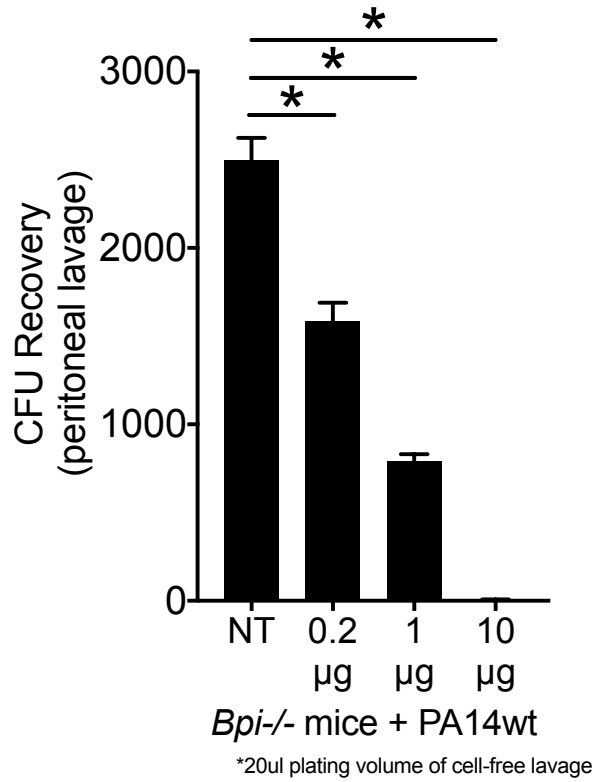

**Supplemental Figure 9: Dose-dependent response of BPI in clearing *P. aeruginosa in vivo*.** Increasing concentrations of BPI i.p. treatment in *Bpi*<sup>-/-</sup> mice infected with PA14wt results in reduction in PA14 CFU recovery from cell-free peritoneal lavage. Data were analyzed by paired t-test; \*p < 0.05; Error bars represent mean ± SEM.

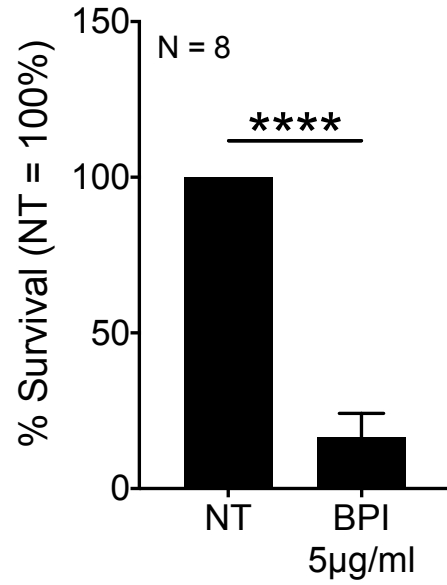

**Supplemental Figure 10:** BPI exhibits direct cytotoxic activity towards *P. aeruginosa in vitro*. The graph represents percent survival of PAO1wt when exposed to BPI at 5µg/ml for 30mins, compared to no BPI treatment counterparts. Data were analyzed by paired t-test; \*\*\*\*p < 0.0001; Error bars represent mean ± SEM.

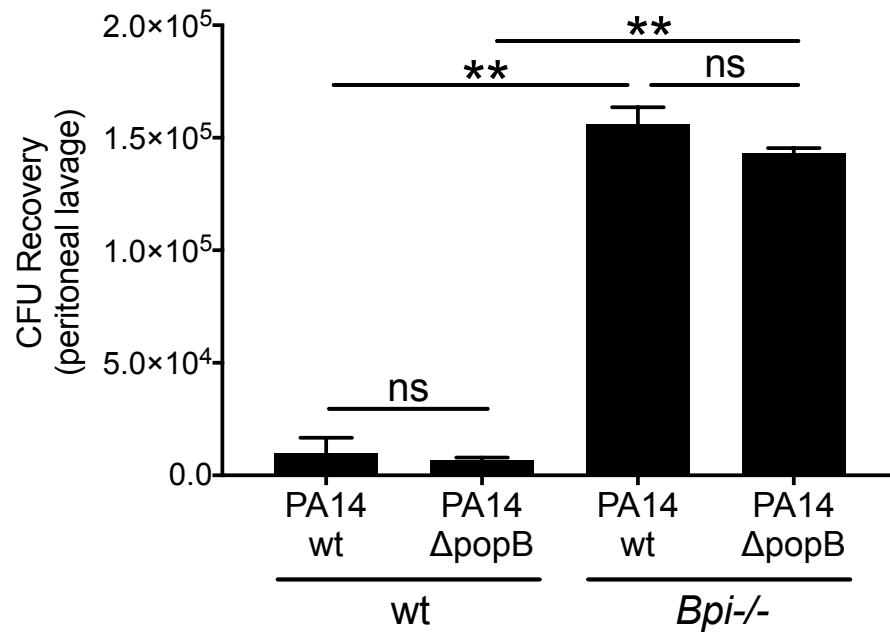

**Supplemental Figure 11:** Peritoneal lavage CFU recovery from mice (n=2) sufficient (wt) or deficient (*Bpi*<sup>-/-</sup>) in BPI infected with *P. aeruginosa* strains sufficient (PA14wt) and deficient (PA14ΔpopB) in Type III secretion system (T3SS) translocon. Data were analyzed by paired t-test; \*\*p < 0.01; ns = not significant; Error bars represent mean ± SEM.

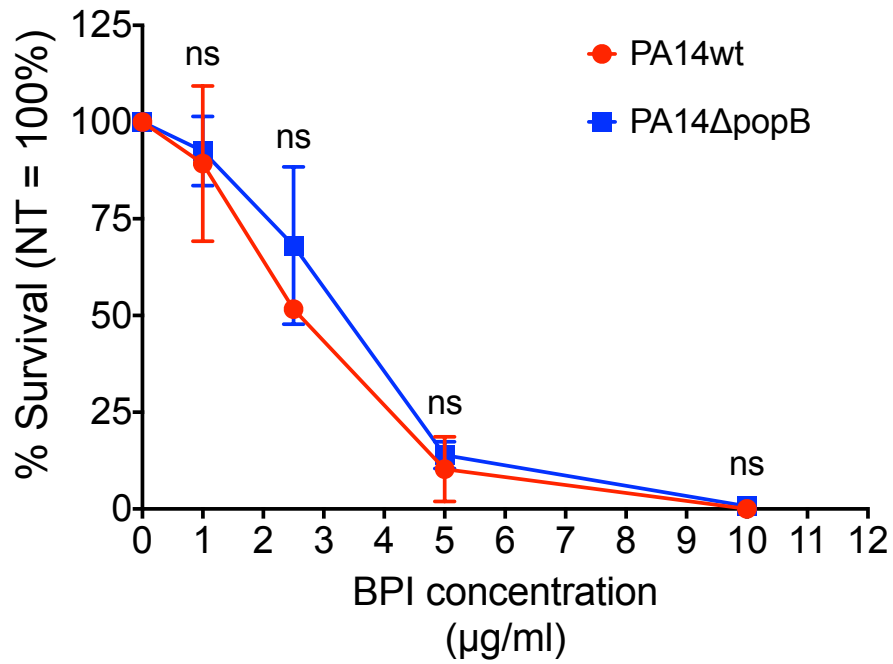

**Supplemental Figure 12:** Percent survival of *P. aeruginosa* strains sufficient (PA14wt) and deficient (PA14ΔpopB) in Type III secretion system (T3SS) translocon with human BPI treatment (0, 1, 2.5, 5, 10 μg/ml) *in vitro* (n=2). Data were analyzed by paired t-test; ns = not significant; Error bars represent mean ± SEM.
